# Supplementary material
Source: MDPI journal article supplement (https://www.mdpi.com/2073-4441/12/1/203)
Supplement: s1 [file s1]

Electronic Supplementary Material to “Integrating sustainable stormwater management in urban planning: Ways forward towards institutional change and collaborative action”

**Table S1.** Overview of perceived challenges for and needs to improve sustainable stormwater planning and management in Sweden, and proposed ways forward through institutional developments

| Theme                                                            | Experienced challenges                                                                                                                                                                                                                                                                                                                                                                                                                                                                                                                       | Articulated needed developments                                                                                                                                                                                                                                                                                                                                                                                                   | Ways forward (institutional developments)                                                                                                                                                                                                                                                                                                                                                                                                                                                                                             |
|------------------------------------------------------------------|----------------------------------------------------------------------------------------------------------------------------------------------------------------------------------------------------------------------------------------------------------------------------------------------------------------------------------------------------------------------------------------------------------------------------------------------------------------------------------------------------------------------------------------------|-----------------------------------------------------------------------------------------------------------------------------------------------------------------------------------------------------------------------------------------------------------------------------------------------------------------------------------------------------------------------------------------------------------------------------------|---------------------------------------------------------------------------------------------------------------------------------------------------------------------------------------------------------------------------------------------------------------------------------------------------------------------------------------------------------------------------------------------------------------------------------------------------------------------------------------------------------------------------------------|
| Making space for water                                           | <ul style="list-style-type: none"> <li>- Stormwater is not an issue firmly established on political agendas.</li> <li>- Physical planning does not consider stormwater from a landscape/ecosystem perspective.</li> <li>- Stormwater management perspectives are integrated too late in the planning process.</li> </ul>                                                                                                                                                                                                                     | <ul style="list-style-type: none"> <li>- Planning must be based on investigations of watershed scale preconditions.</li> <li>- Risks and needs related to stormwater must be integrated when taking land use decisions.</li> <li>- Planning of stormwater management must be made for larger areas than what is covered by detail plans</li> <li>- Co-benefits of sustainable stormwater management must be addressed.</li> </ul> | <ul style="list-style-type: none"> <li>- Assessments of stormwater risks, needs, and benefits at a watershed level must be made a mandatory step and an obligatory starting point for comprehensive planning.</li> <li>- Planning of stormwater should target areas in the urban landscape rather than areas within detail plans.</li> <li>- The delineation of detail plans should include reservation of space for nature-based solutions aimed at managing stormwater above ground, especially related to future needs.</li> </ul> |
| Designing an organization for sustainable stormwater planning    | <ul style="list-style-type: none"> <li>- The sectoral division in municipalities cause silo structures which are not suitable for sustainable stormwater planning.</li> <li>- The storm water issue has no clear affiliation – no division has a mandate to take decisions that affect others.</li> <li>- The sector specific budgets obstruct collaboration.</li> <li>- A culture of referral rather than co-development of plans cause distrust.</li> <li>- Important stakeholders are involved too late in planning processes.</li> </ul> | <ul style="list-style-type: none"> <li>- Stormwater issues and projects require coordination and a clear leadership</li> <li>- The responsibility for different aspects of stormwater planning and management must be clarified.</li> <li>- More actors need to be involved earlier on in planning processes.</li> <li>- Water utilities need to include and improve in-house competence on planning.</li> </ul>                  | <ul style="list-style-type: none"> <li>- Coordination and leadership of stormwater management should be established at a central municipal management office.</li> <li>- Resources for urban development should be pooled to enable funding for cross-sectoral stormwater projects and measures.</li> <li>- Plans regarding drinking water, sewage, and stormwater should be integrated to avoid misaligned strategic goals.</li> </ul>                                                                                               |
| Ensuring continuation and implementation of stormwater ambitions | <ul style="list-style-type: none"> <li>- Gap between the intention of plans and implemented realities.</li> <li>- Continuation between comprehensive plans, detail plans and building permits is lacking.</li> <li>- Planners see a need for more competence on sustainable stormwater management among implementing actors.</li> <li>- Actors closer to implementation see a need</li> </ul>                                                                                                                                                | <ul style="list-style-type: none"> <li>- More collaboration and co-creation between stakeholders at different levels of the planning process.</li> <li>- Better control if plan intentions are followed in the construction phase and land use over time</li> </ul>                                                                                                                                                               | <ul style="list-style-type: none"> <li>- Networks for vertical interaction that facilitate mutual learning and dialogue should be put in place.</li> <li>- Actors from different stages in the vertical planning process should be physically placed in the same building to allow for informal interaction, dialogue which build trustful relations.</li> <li>- The original plan author should follow the process from plan formulation to implementation to ensure persistence and continuity of stormwater plans.</li> </ul>      |

|  |                                                                                                                                                                                                                                                                                                                                                                        |  |                                                                                                                                                                                                                                                                                                        |
|--|------------------------------------------------------------------------------------------------------------------------------------------------------------------------------------------------------------------------------------------------------------------------------------------------------------------------------------------------------------------------|--|--------------------------------------------------------------------------------------------------------------------------------------------------------------------------------------------------------------------------------------------------------------------------------------------------------|
|  | <p>for an improved competence base among centrally positioned planners.</p> <ul style="list-style-type: none"><li>- Property developers and permit officials are not involved in the design of stormwater plans.</li><li>- Lack of control regarding whether the plan instructions regarding stormwater are followed in the construction phase and over time</li></ul> |  | <ul style="list-style-type: none"><li>- Routines for monitoring and evaluation must be institutionalized to follow up the intention of plans. This should come with a mandate and resources for those in charge.</li><li>- to construction to secure that intentions of plans are fulfilled.</li></ul> |
|--|------------------------------------------------------------------------------------------------------------------------------------------------------------------------------------------------------------------------------------------------------------------------------------------------------------------------------------------------------------------------|--|--------------------------------------------------------------------------------------------------------------------------------------------------------------------------------------------------------------------------------------------------------------------------------------------------------|
